# Supplementary material for: A Strategic Target Rescues Trimethoprim Sensitivity in Escherichia coli
Source: PubMed Central journal article supplement — iScience. 2020 Mar 16;23(4):100986. doi: 10.1016/j.isci.2020.100986 (PMC7115098; doi:10.1016/j.isci.2020.100986), 2020-03-16
Supplement: mmc1.pdf [file mmc1.pdf]

iScience, Volume 23

## Supplemental Information

### A Strategic Target Rescues

#### Trimethoprim Sensitivity in *Escherichia coli*

Amrisha Bhosle, Akshay Datey, Giridhar Chandrasekharan, Deepshikha Singh, Dipshikha Chakravortty, and Nagasuma Chandra

# Supplementary Information

## Supplementary Figures

**Figure S1: Growth of WT and laboratory-evolved TMP-resistant 32xR *E. coli* [related to Figure 1]:** Growth curves of 32xR1 and 32xR2 *E. coli* in presence (-T) and absence of 16  $\mu\text{g}/\text{mL}$  TMP; and respective *E. coli* K12 MG1655 parents (WT1 and WT2) are shown.  $A_{600}$  recorded at each hour is shown as mean  $\pm$  SD. The 32xR strains grow only marginally slower as compared to their respective WT parents and there is no significant difference in growth in presence and absence of 16  $\mu\text{g}/\text{mL}$  TMP.

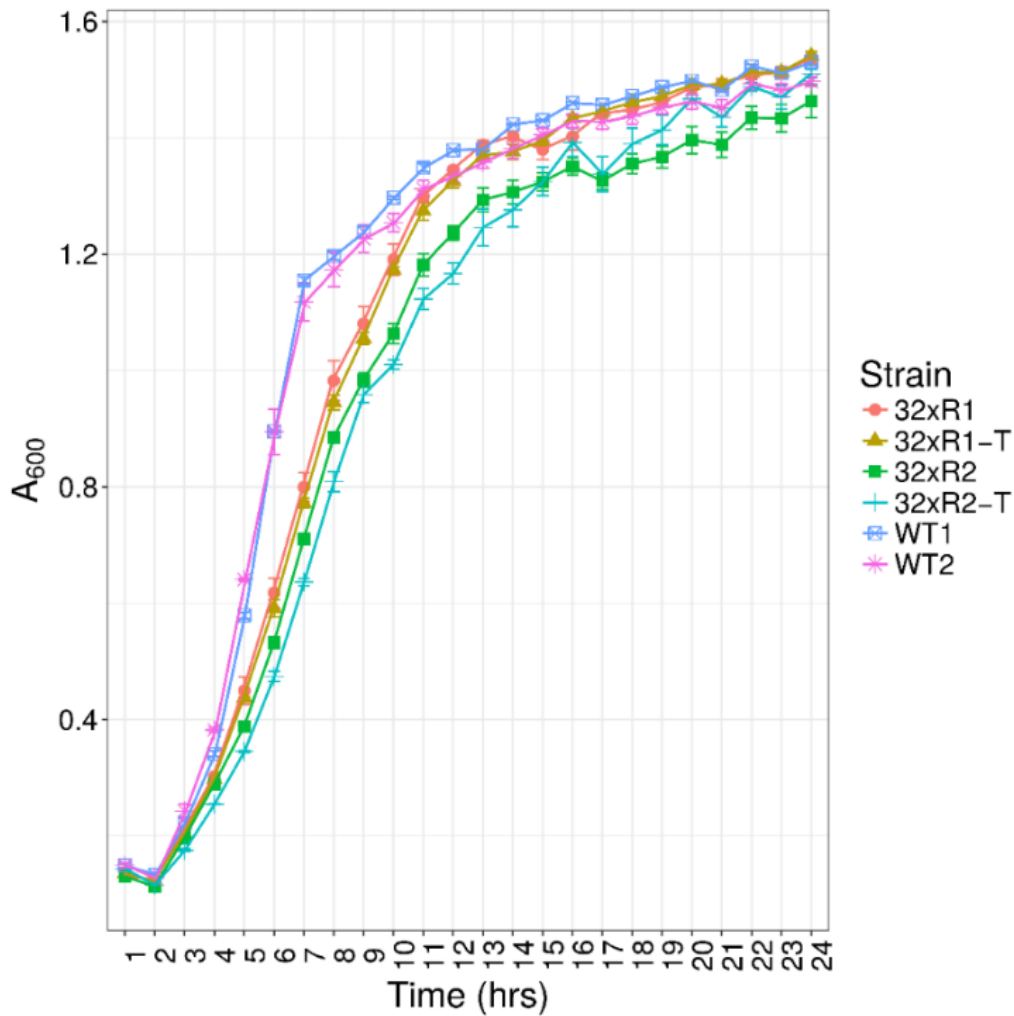

9  
10  
11  
12  
13  
14  
15

16 **Figure S2: Clusters identified in 32xTopNet [related to Table 1]:** ClusterONE (Clustering  
 17 with Overlapping Neighbourhood Expansion (Nepusz et al., 2012)) was used to identify  
 18 clusters based on edge-weights. ClusterONE identifies clusters with overlapping nodes. For  
 19 example, if a gene pair A-B has a higher edge-weight and so does the pair A-C but not the pair  
 20 B-C, then gene A will be observed in two clusters, one which has gene B and its interactions  
 21 and another which has gene C and its interactions. Therefore, multiple clusters containing the  
 22 same genes are observed. 26 clusters were identified.

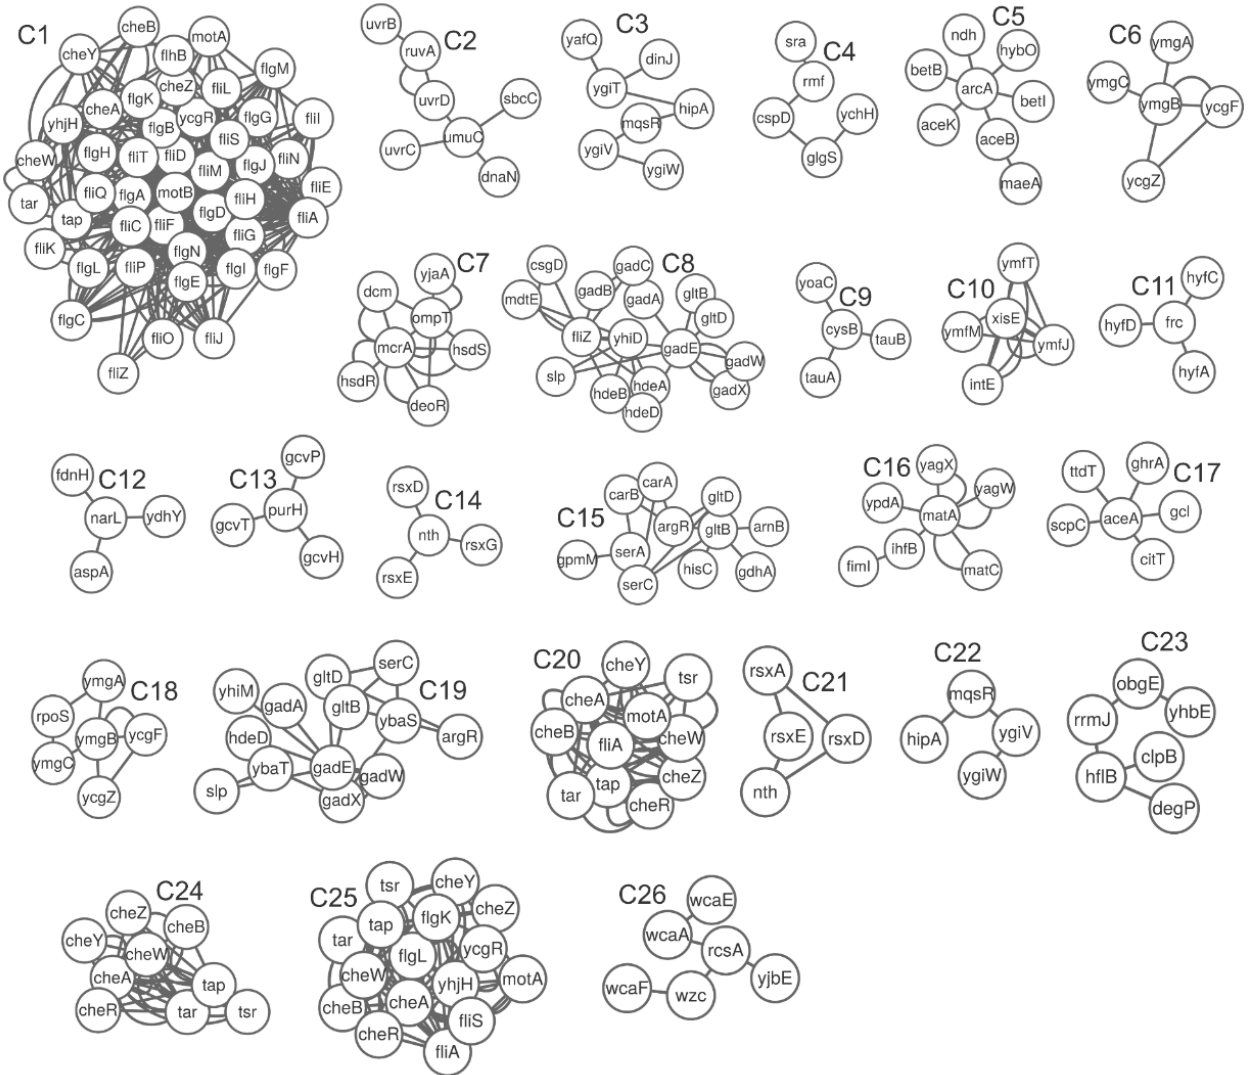

23  
 24  
 25  
 26  
 27  
 28  
 29  
 30

31 **Figure S3: Biofilm formation [related to Table 1, Figure 1 and Figure 2]:** (a) Biofilm  
 32 quantification by crystal violet staining ( $A_{590}$  data plotted as mean  $\pm$  SD) showed that biofilm  
 33 production by the 32xR strains both in the absence and presence of 16  $\mu\text{g/mL}$  TMP was higher  
 34 as compared to WT. (b) Scanning electron microscopy (SEM) images at 4000X of *E. coli*  
 35 biofilms showed that 32xR *E. coli* clump together in a biofilm matrix whereas WT appear mostly  
 36 as separate cells. The clumping in each field is demarcated for ease of viewing.

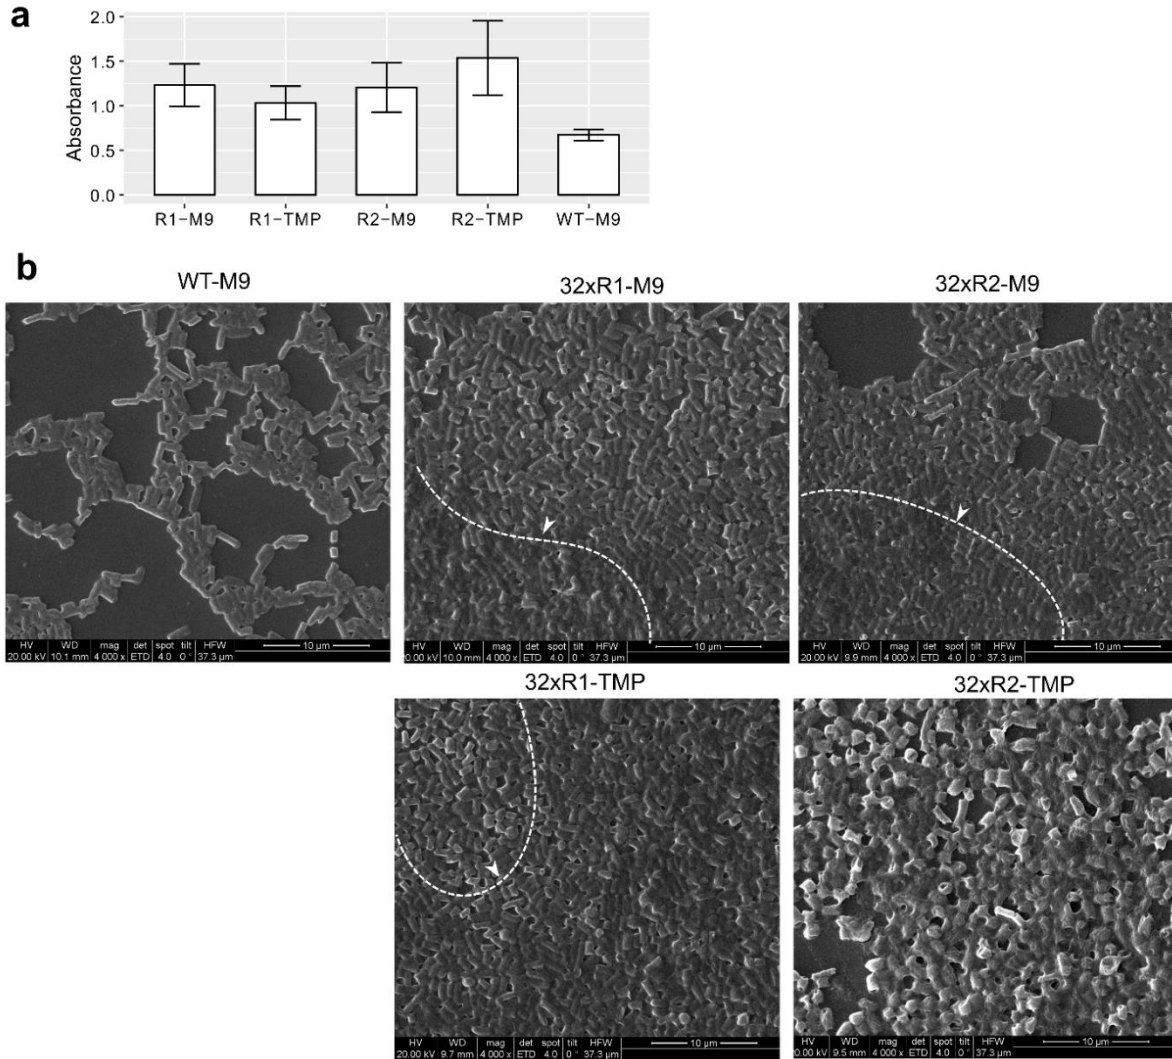

37  
 38  
 39  
 40  
 41  
 42  
 43  
 44  
 45

46 **Figure S4: Confirmation of *glyA* knockouts [related to Figure 2C]**

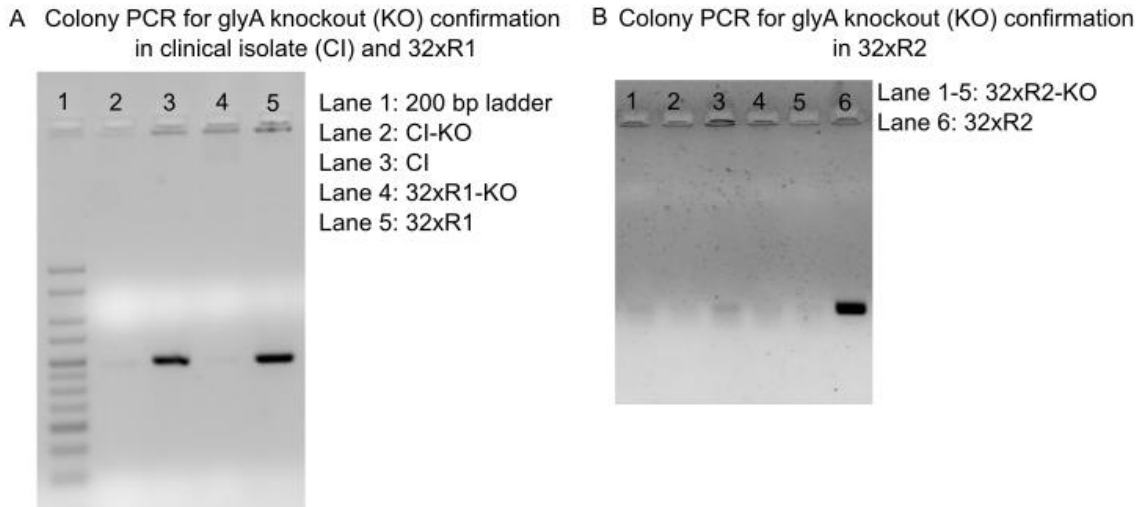

47

48 **Figure S5: Growth curves of 32xR1, 32xR2 and CI and their respective *glyA* knockouts**  
 49 **[related to Figure 2]:** Growth in the absence of TMP was profiled for 32xR strains and clinical  
 50 isolate-CI (red) and their respective  $\Delta glyA$  (black) over 24 hours.  $\log_{10}(\text{CFU/mL})$  is the average  
 51 of two biological replicates.

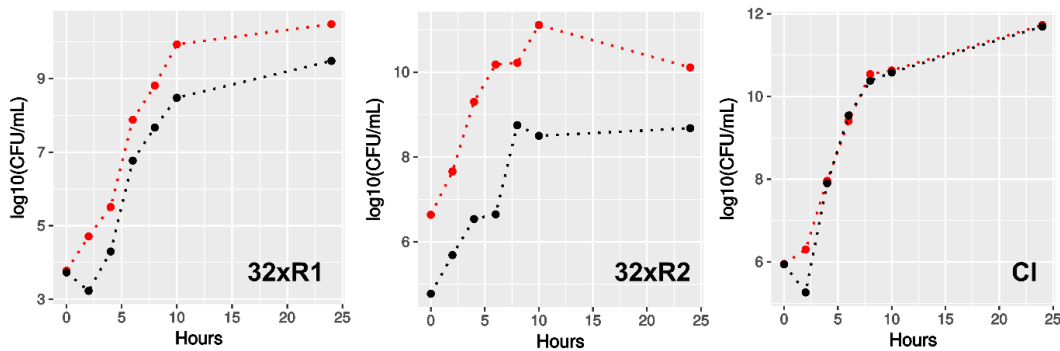

52

53 **Figure S6: Biofilm formation by WT in response to TMP stress [related to Figures 1 and**  
 54 **Figure 3]:** Biofilm quantification by crystal violet staining ( $A_{590}$  data plotted as mean  $\pm$  SD)  
 55 showed that biofilm production in WT increases upon exposure to sub-inhibitory, but stress  
 56 inducing, TMP concentrations i.e. 0.25xMIC (0.125  $\mu\text{g/mL}$ ) and 0.5xMIC (0.25  $\mu\text{g/mL}$ ) (p-value  
 57  $< 0.01$ ).

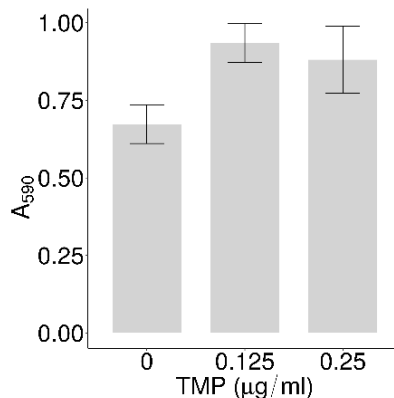

58

59 **Supplementary Tables**

60 **Table S1: DEGs in the 32xR *E. coli* [related to Figure 1]:** log<sub>2</sub>FC is the mean log<sub>2</sub>FC for the  
 61 32xR1 and 32xR2 strains

| Gene        | log <sub>2</sub> FC |
|-------------|---------------------|-------------|---------------------|-------------|---------------------|-------------|---------------------|-------------|---------------------|
| <i>ais</i>  | 1.81                | <i>recN</i> | 1.76                | <i>yeeD</i> | 2.55                | <i>codB</i> | -1.99               | <i>maeA</i> | -1.1                |
| <i>allB</i> | 1.61                | <i>recX</i> | 3.49                | <i>yeeE</i> | 2.88                | <i>cyaA</i> | -1.21               | <i>metE</i> | -2.01               |
| <i>aphA</i> | 1.41                | <i>rfaB</i> | 1.29                | <i>yegJ</i> | 1.33                | <i>cybB</i> | -1.75               | <i>mipA</i> | -1.06               |
| <i>aspA</i> | 2.82                | <i>rfaI</i> | 1.02                | <i>yfaE</i> | 1.18                | <i>entD</i> | -1.24               | <i>mntH</i> | -1.17               |
| <i>betB</i> | 1.87                | <i>rfaS</i> | 1.21                | <i>yfbP</i> | 1.57                | <i>fdnH</i> | -1.19               | <i>modA</i> | -1.73               |
| <i>betI</i> | 2.4                 | <i>rhsA</i> | 1.32                | <i>yfcV</i> | 1.53                | <i>fecR</i> | -1.18               | <i>modB</i> | -1.63               |
| <i>cadA</i> | 1.02                | <i>rhsD</i> | 2.61                | <i>yfdY</i> | 1.21                | <i>fepA</i> | -1.54               | <i>modC</i> | -1.87               |
| <i>csiE</i> | 1.71                | <i>ribB</i> | 1.06                | <i>ygck</i> | 1.21                | <i>fhuE</i> | -2.04               | <i>modF</i> | -1.2                |
| <i>dinG</i> | 1.26                | <i>rnf</i>  | 1.78                | <i>yglL</i> | 2.06                | <i>fimA</i> | -5.72               | <i>motA</i> | -4.91               |
| <i>dinI</i> | 2.13                | <i>ruvA</i> | 1.56                | <i>ygcO</i> | 1.03                | <i>fimC</i> | -3.58               | <i>motB</i> | -5.29               |
| <i>dinJ</i> | 1.33                | <i>sbmC</i> | 1.54                | <i>ygdQ</i> | 1.02                | <i>fimD</i> | -2.42               | <i>ndh</i>  | -1.44               |
| <i>dinQ</i> | 2.83                | <i>sfmD</i> | 1.3                 | <i>ygiS</i> | 2.9                 | <i>fimF</i> | -2.66               | <i>ompF</i> | -1.35               |
| <i>emrE</i> | 1.35                | <i>smpA</i> | 1.06                | <i>ygiT</i> | 3.47                | <i>fimG</i> | -2.62               | <i>ompT</i> | -3.47               |
| <i>fimB</i> | 1.31                | <i>sucA</i> | 1.34                | <i>ygiV</i> | 1.24                | <i>fimH</i> | -2.02               | <i>oppA</i> | -1.17               |
| <i>fimE</i> | 1.21                | <i>sulA</i> | 3.57                | <i>ygiW</i> | 2.3                 | <i>fimI</i> | -4.58               | <i>pntB</i> | -1.45               |
| <i>folA</i> | 4.27                | <i>tauA</i> | 1.16                | <i>ygiZ</i> | 1.02                | <i>fiu</i>  | -2.84               | <i>pqqL</i> | -3.6                |
| <i>frc</i>  | 1.1                 | <i>tauB</i> | 1.01                | <i>ygiN</i> | 2.46                | <i>flgA</i> | -4.89               | <i>pyrB</i> | -3.06               |
| <i>ftnB</i> | 1.6                 | <i>tdcB</i> | 1.33                | <i>yhdN</i> | 1.43                | <i>flgB</i> | -5.87               | <i>pyrD</i> | -1.53               |
| <i>gadA</i> | 2.82                | <i>tfaE</i> | 1.9                 | <i>yhhH</i> | 1.42                | <i>flgC</i> | -5.85               | <i>pyrI</i> | -3                  |
| <i>gadB</i> | 2.79                | <i>tisA</i> | 4.8                 | <i>yhiD</i> | 3.02                | <i>flgD</i> | -5.94               | <i>rnb</i>  | -1.11               |
| <i>gadC</i> | 2.15                | <i>tisB</i> | 5.07                | <i>yhiM</i> | 2.34                | <i>flgE</i> | -5.55               | <i>rsxD</i> | -1.1                |
| <i>gadE</i> | 3.55                | <i>torA</i> | 3.53                | <i>yhiP</i> | 2.35                | <i>flgF</i> | -5.63               | <i>rsxE</i> | -1.11               |
| <i>gadX</i> | 3.37                | <i>torC</i> | 5.91                | <i>yhjX</i> | 4.66                | <i>flgG</i> | -5.31               | <i>rsxG</i> | -1.06               |
| <i>galE</i> | 1.89                | <i>torD</i> | 3.09                | <i>yibA</i> | 1.17                | <i>flgH</i> | -4.87               | <i>sapA</i> | -1.33               |
| <i>glgS</i> | 1.33                | <i>torY</i> | 2.07                | <i>yibD</i> | 1.88                | <i>flgI</i> | -4.69               | <i>serA</i> | -3.03               |
| <i>gltS</i> | 1.42                | <i>tyrP</i> | 1.01                | <i>yibT</i> | 1.42                | <i>flgJ</i> | -4.68               | <i>shiA</i> | -1.18               |
| <i>glyA</i> | 1.26                | <i>umuC</i> | 3.95                | <i>yibV</i> | 2.22                | <i>flgK</i> | -5.19               | <i>speD</i> | -1.36               |
| <i>guaA</i> | 1.28                | <i>umuD</i> | 3.15                | <i>yjbJ</i> | 1.33                | <i>flgL</i> | -4.7                | <i>speE</i> | -1.26               |
| <i>hdeA</i> | 3.36                | <i>wcaD</i> | 1.58                | <i>yjbM</i> | 1.04                | <i>flgM</i> | -4.73               | <i>sufD</i> | -1.21               |
| <i>hdeB</i> | 3.14                | <i>wcaE</i> | 1.79                | <i>yjbR</i> | 1.46                | <i>flgN</i> | -4.71               | <i>tap</i>  | -5.49               |
| <i>hdeD</i> | 2.74                | <i>wcaF</i> | 1.38                | <i>yjeN</i> | 1.48                | <i>flhA</i> | -3.2                | <i>tar</i>  | -6.11               |
| <i>hflB</i> | 1.17                | <i>xapR</i> | 1.41                | <i>yjfJ</i> | 1.14                | <i>flhB</i> | -3.99               | <i>thrA</i> | -2.41               |
| <i>hha</i>  | 1.14                | <i>xisE</i> | 5.66                | <i>yjfK</i> | 2.32                | <i>flhE</i> | -3.66               | <i>thrB</i> | -2.07               |
| <i>hlyE</i> | 1.28                | <i>yacL</i> | 1.51                | <i>yjhl</i> | 2.67                | <i>fliA</i> | -5.4                | <i>thrC</i> | -2.18               |
| <i>htrL</i> | 1.46                | <i>yadC</i> | 1.19                | <i>ymfD</i> | 1.9                 | <i>fliC</i> | -5.69               | <i>trg</i>  | -2.32               |
| <i>hybO</i> | 1.86                | <i>yadI</i> | 1.17                | <i>ymfJ</i> | 5.96                | <i>fliD</i> | -5.47               | <i>trpE</i> | -6.27               |
| <i>idnD</i> | 1.05                | <i>yadK</i> | 1.81                | <i>ymfL</i> | 4.8                 | <i>fliE</i> | -4.31               | <i>tsr</i>  | -4.83               |
| <i>intE</i> | 5.64                | <i>yafK</i> | 1.14                | <i>ymfM</i> | 4.33                | <i>fliF</i> | -5.2                | <i>tyrR</i> | -1.11               |
| <i>iraP</i> | 1.46                | <i>yafQ</i> | 1.24                | <i>ymfN</i> | 4.16                | <i>fliG</i> | -5.35               | <i>ves</i>  | -2.74               |
| <i>lamB</i> | 2.47                | <i>yagK</i> | 1.1                 | <i>ymfQ</i> | 3.33                | <i>fliH</i> | -5.08               | <i>ycgR</i> | -4.96               |

|             |                          |             |                          |             |                          |             |                          |             |                          |
|-------------|--------------------------|-------------|--------------------------|-------------|--------------------------|-------------|--------------------------|-------------|--------------------------|
| <i>lit</i>  | 1.59                     | <i>yagL</i> | 1.14                     | <i>ymfR</i> | 3.51                     | <i>fliI</i> | -5.15                    | <i>yciT</i> | -2.06                    |
| <b>Gene</b> | <b>log<sub>2</sub>FC</b> |
| <i>livJ</i> | 3.18                     | <i>yahA</i> | 2.59                     | <i>ymfS</i> | 1.16                     | <i>fliJ</i> | -5.38                    | <i>yciZ</i> | -1.71                    |
| <i>lrhA</i> | 1.2                      | <i>yahL</i> | 1.17                     | <i>ymfT</i> | 4.37                     | <i>fliK</i> | -4.84                    | <i>ycjF</i> | -1.3                     |
| <i>lysU</i> | 3.38                     | <i>ybaJ</i> | 1.44                     | <i>ymgA</i> | 4.91                     | <i>fliL</i> | -5.47                    | <i>ycjQ</i> | -1.12                    |
| <i>malk</i> | 2.88                     | <i>ybaS</i> | 1.58                     | <i>ymgB</i> | 4.16                     | <i>fliM</i> | -5.51                    | <i>ycjU</i> | -1.5                     |
| <i>malM</i> | 2.4                      | <i>ybaT</i> | 1.29                     | <i>ymgC</i> | 3.54                     | <i>fliN</i> | -4.99                    | <i>ycjX</i> | -1.23                    |
| <i>malP</i> | 1.57                     | <i>ybbC</i> | 2.21                     | <i>ynbB</i> | 1.27                     | <i>fliO</i> | -4.86                    | <i>ydcA</i> | -1.11                    |
| <i>malQ</i> | 1.14                     | <i>ybcL</i> | 1.71                     | <i>yoaC</i> | 1.37                     | <i>fliP</i> | -4.89                    | <i>ydcM</i> | -1.16                    |
| <i>matA</i> | 2.14                     | <i>ybcM</i> | 1.88                     | <i>yoeB</i> | 1.78                     | <i>fliQ</i> | -4.66                    | <i>yddA</i> | -3.21                    |
| <i>mcrA</i> | 2.16                     | <i>ybcS</i> | 1.03                     | <i>ypfM</i> | 2.56                     | <i>fliR</i> | -3.34                    | <i>yddb</i> | -3.09                    |
| <i>mdtE</i> | 1.36                     | <i>ybeD</i> | 1.31                     | <i>yrbL</i> | 1.06                     | <i>fliS</i> | -5.18                    | <i>ydeA</i> | -1.41                    |
| <i>mdtF</i> | 1.57                     | <i>ybhQ</i> | 1.48                     | <i>zntR</i> | 1.55                     | <i>fliT</i> | -4.95                    | <i>ydeE</i> | -1.24                    |
| <i>mokC</i> | 1.31                     | <i>ybiU</i> | 1.08                     | <i>aceA</i> | -2.42                    | <i>fliZ</i> | -5.22                    | <i>ydfH</i> | -1.21                    |
| <i>mqsR</i> | 4.15                     | <i>ybiV</i> | 1.03                     | <i>aceB</i> | -2.5                     | <i>flxA</i> | -4.8                     | <i>ydfX</i> | -1.12                    |
| <i>nrdA</i> | 1.26                     | <i>ycbW</i> | 2.27                     | <i>aceK</i> | -2.25                    | <i>gcvH</i> | -2.46                    | <i>ydfZ</i> | -1.82                    |
| <i>nrdB</i> | 1.43                     | <i>ycdT</i> | 2.72                     | <i>adk</i>  | -1.27                    | <i>gcvP</i> | -2.41                    | <i>ydgA</i> | -1.04                    |
| <i>obgE</i> | 1.93                     | <i>ycdU</i> | 2.83                     | <i>aroA</i> | -1.19                    | <i>gcvT</i> | -2.74                    | <i>ydgl</i> | -1.03                    |
| <i>osmB</i> | 1.62                     | <i>yceJ</i> | 1.72                     | <i>aroH</i> | -2.63                    | <i>gltB</i> | -5                       | <i>ydiE</i> | -2.23                    |
| <i>pabC</i> | 1.47                     | <i>yceO</i> | 1.51                     | <i>bglX</i> | -1.06                    | <i>gltD</i> | -4.65                    | <i>yecR</i> | -2.7                     |
| <i>phoA</i> | 1.57                     | <i>ycfK</i> | 1.63                     | <i>carA</i> | -2.79                    | <i>hisA</i> | -1.03                    | <i>yeiE</i> | -1.14                    |
| <i>potE</i> | 1.11                     | <i>ycgZ</i> | 3.68                     | <i>carB</i> | -2.43                    | <i>hisH</i> | -1.09                    | <i>ygff</i> | -1.97                    |
| <i>proV</i> | 1.62                     | <i>ydhY</i> | 1.04                     | <i>cheA</i> | -5.78                    | <i>hmp</i>  | -1.25                    | <i>yghJ</i> | -1.27                    |
| <i>pspG</i> | 1.7                      | <i>ydjF</i> | 1.42                     | <i>cheB</i> | -5.11                    | <i>htpG</i> | -1.3                     | <i>yhhJ</i> | -1.24                    |
| <i>purC</i> | 1.19                     | <i>ydjH</i> | 1.1                      | <i>cheR</i> | -5.34                    | <i>ilvH</i> | -1.57                    | <i>yhjG</i> | -1.17                    |
| <i>qseB</i> | 1.64                     | <i>yeal</i> | 1.29                     | <i>cheW</i> | -6.09                    | <i>ilvI</i> | -1.81                    | <i>yhjH</i> | -4.97                    |
| <i>qseC</i> | 1.03                     | <i>yebF</i> | 2.41                     | <i>cheY</i> | -5.37                    | <i>leuA</i> | -1.73                    | <i>yjcZ</i> | -3.12                    |
| <i>rbsD</i> | 1.87                     | <i>yebG</i> | 2                        | <i>cheZ</i> | -5.13                    | <i>leuB</i> | -1.98                    | <i>yjdA</i> | -1.44                    |
| <i>rcaA</i> | 1.75                     | <i>yebN</i> | 1.96                     | <i>cirA</i> | -2.34                    | <i>leuC</i> | -1.93                    | <i>ykfb</i> | -1.11                    |
| <i>recA</i> | 2.35                     | <i>yedW</i> | 1.23                     | <i>codA</i> | -1.7                     | <i>leuD</i> | -1.76                    | <i>ymdA</i> | -2.5                     |

62

63

64

65

66

67

68

69

70

71

72 **Table S2: Confirmation of fold change obtained from microarray with qPCR [related to**  
 73 **Figure 1]:** Mean log<sub>2</sub>FC of 3 DEGs viz. *folA*, *hdeA* and *gadX* in 4xR1, 4xR2, 32xR1 and 32xR2  
 74 obtained from microarray and qPCR (*rplF* and 16s as housekeeping controls). The qPCR was  
 75 carried out using the same RNA that was used for microarray.

| Gene        | Type        | 4xR1 | 4xR2 | 32xR1 | 32xR2 |
|-------------|-------------|------|------|-------|-------|
| <i>folA</i> | Microarray  | 2.85 | 3.87 | 4.7   | 3.78  |
| <i>folA</i> | <i>rplF</i> | 3.49 | 3.64 | 5     | 3.45  |
| <i>folA</i> | 16s         | 3.01 | 3.86 | 4.32  | 3.63  |
| <i>hdeA</i> | Microarray  | 2.51 | 3.71 | 3.82  | 3.02  |
| <i>hdeA</i> | <i>rplF</i> | 2.8  | 3.44 | 4.47  | 3.14  |
| <i>hdeA</i> | 16s         | 2.31 | 3.65 | 3.79  | 3.32  |
| <i>gadX</i> | Microarray  | 2.23 | 1.98 | 3.51  | 3.27  |
| <i>gadX</i> | <i>rplF</i> | 2.6  | 1.61 | 3.36  | 2.92  |
| <i>gadX</i> | 16s         | 2.11 | 1.82 | 2.67  | 3.09  |

76

77 **Table S3: Selection of top-ranked shortest paths (top-paths) for 32xTopNet generation**  
 78 **[related to Figure 2]:** Shortest paths were sorted according to path cost and subsets of top-  
 79 ranked shortest paths (top-paths) were analysed. DEG enrichment was estimated for different  
 80 subsets. The number provided in bracket is the percentage of total genes (G=3435) or DEGs  
 81 (D=345) that were picked in a particular subset. For topnet extraction, we sought a subset  
 82 such that  $d > 0.75 * D$  and hypergeometric enrichment p-value  $\leq 0.05$ . The hypergeometric  
 83 probability is a measure of how many successes (DEGs-d) are included in a subset of the  
 84 population (topnet-g) as compared to successes (D) present in the entire population (G).  
 85 Subset containing top 0.4% top-ranked shortest paths (top-paths) was seen to satisfy these  
 86 requirements.

| % Top-paths | No. of Paths | Total no. of genes (g) (%) | DEGs (d) (%)    | Enrichment p-value |
|-------------|--------------|----------------------------|-----------------|--------------------|
| 0.05        | 4207         | 511 (15)                   | 117 (34)        | 3.27E-22           |
| 0.1         | 8413         | 923 (27)                   | 157 (45)        | 2.96E-16           |
| 0.15        | 12621        | 1478 (43)                  | 203 (59)        | 3.66E-11           |
| 0.2         | 16828        | 2040 (59)                  | 235 (68)        | 4.61E-05           |
| 0.25        | 21035        | 2172 (63)                  | 240 (70)        | 0.001              |
| 0.3         | 25242        | 2308 (67)                  | 248 (72)        | 0.007              |
| 0.35        | 29449        | 2415 (70)                  | 252 (73)        | 0.047              |
| <b>0.4</b>  | <b>33656</b> | <b>2509 (73)</b>           | <b>269 (78)</b> | <b>0.003</b>       |
| 0.45        | 37863        | 2863 (83)                  | 292 (85)        | 0.086              |
| 0.5         | 42070        | 2961(86)                   | 296 (86)        | 0.345              |

87

88

89

90

91



92 **Table S4: : Confirmation of upregulation of genes in 32xR *E. coli* with qPCR [related to**  
 93 **Figure 2]:** (a) Normalized fold expression of: *glyA*, *csgD*, GASR (*gadA*, *gadB*, *gadE*) genes in  
 94 WT grown in 0.125 µg/mL TMP, and 32xR1, 32xR2 and the clinical isolate (CI) grown in  
 95 absence of TMP (b) *gcvT* in WT grown in 0.125 µg/mL TMP and CI grown in 16 µg/mL TMP;  
 96 as compared to WT grown in the absence of TMP. Average of two replicates is shown (c)  
 97 Primers and annealing temperatures.

98 **(a) Normalized fold expression**

| Gene        | WT-0.125 µg/mL TMP | 32xR1 | 32xR2 | CI    |
|-------------|--------------------|-------|-------|-------|
| <i>glyA</i> | 2.24               | 28.24 | 1.08  | 1.86  |
| <i>csgD</i> | 0.90               | 32.45 | 0.43  | 32.77 |
| <i>gadA</i> | 2.01               | 11.41 | 13.96 | 33.10 |
| <i>gadB</i> | 2.78               | 6.74  | 7.66  | 45.57 |
| <i>gadE</i> | 3.09               | 1.41  | 9.49  | 85.09 |

99

100 **(b) Normalized fold expression**

| Gene        | WT-0.125 µg/mL TMP | CI-16 µg/mL TMP |
|-------------|--------------------|-----------------|
| <i>folA</i> | 3.42               | 2.14            |
| <i>gcvT</i> | 0.29               | 0.69            |
| <i>glyA</i> | 3.12               | 2.00            |

101

102

103

104

105 **(c) Primers and annealing temperatures**

| Gene                      | Primer sequence (5'-3') |                       | T <sub>A</sub> (°C) |
|---------------------------|-------------------------|-----------------------|---------------------|
| <i>16s</i><br><i>rRNA</i> | FP                      | CGGACGGGTGAGTAATGTCT  | 58                  |
|                           | RP                      | CTCAGACCAGCTAGGGATCG  |                     |
| <i>glyA</i>               | FP                      | GGCTGGACGTTAGCGTAGTC  | 58                  |
|                           | RP                      | CTGATCGCCTCCGAAAATA   |                     |
| <i>csgD</i>               | FP                      | CGATGAGTAAGGAGGGCTGA  | 58                  |
|                           | RP                      | TACCGCGACATTGAAAATA   |                     |
| <i>gadA</i>               | FP                      | TTATGGACGTTTTCGTCGTC  | 55                  |
|                           | RP                      | GAAGCTGTTAACGGATTTCC  |                     |
| <i>gadB</i>               | FP                      | GCGGATTGCGGATATTCTTC  | 55                  |
|                           | RP                      | AGAATCAAACGTTTTCCGC   |                     |
| <i>gadE</i>               | FP                      | TGGTAAACACTTGCCCCATAA | 55                  |
|                           | RP                      | GTGACGATGTCGCTCATACG  |                     |
| <i>gcvT</i>               | FP                      | TGCCTCTGGCGGTGTGATAG  | 58                  |
|                           | RP                      | ACAGTGTGGCAGCTTTTGCC  |                     |
| <i>folA</i>               | FP                      | GATTGCGCGTTAGCGGTAG   | 58                  |
|                           | RP                      | TTACGCGATCGTCCGTACCC  |                     |

106

107

108

109 **Table S5: Generations completed after a particular number of hours by BW25113 and its**  
 110 ***glyA* knockout [related to Figure 3]:** It is seen that both strains complete similar number of  
 111 generations after every 12 hours. Over a period of 14 days, ~180 generations are completed.

| Hours  | BW25113: mean | BW25113: SD | $\Delta glyA$ : mean | $\Delta glyA$ : SD |
|--------|---------------|-------------|----------------------|--------------------|
| Dec-24 | 6.24          | 0.03        | 6.43                 | 0.13               |
| 36     | 12.92         | 0.14        | 13.26                | 0.13               |
| 48     | 19.53         | 0.37        | 20.8                 | 0.03               |
| 60     | 26.28         | 0.11        | 26.8                 | 0.11               |
| 72     | 32.88         | 0.14        | 33.41                | 0.08               |
| 84     | 39.15         | 0.21        | 39.53                | 0.3                |
| 96     | 45.57         | 0.17        | 45.96                | 0.1                |
| 108    | 52.52         | 0.13        | 53.12                | 0.12               |
| 120    | 59.34         | 0.13        | 59.79                | 0.25               |
| 132    | 65.87         | 0.07        | 66.2                 | 0.22               |
| 144    | 72.39         | 0.15        | 72.91                | 0.48               |
| 156    | 79.06         | 0.14        | 79.25                | 0.56               |
| 168    | 85.8          | 0.17        | 85.75                | 0.57               |
| 180    | 92.38         | 0.1         | 93.13                | 0.17               |
| 192    | 99.03         | 0.13        | 99.66                | 0.18               |
| 204    | 105.28        | 0.1         | 105.97               | 0.15               |
| 216    | 112.63        | 0.1         | 112.94               | 0.29               |
| 228    | 119.17        | 0.91        | 119.36               | 0.8                |
| 240    | 125.57        | 0.1         | 126.2                | 0.14               |
| 252    | 132.63        | 0.13        | 132.67               | 0.28               |
| 264    | 139.1         | 0.07        | 139.43               | 0.21               |
| 276    | 145.69        | 0.13        | 146.21               | 0.23               |
| 288    | 152.27        | 9.25        | 152.91               | 0.14               |
| 300    | 159.08        | 0.09        | 159.47               | 0.25               |
| 312    | 165.62        | 0.22        | 166.41               | 0.13               |
| 324    | 172.09        | 0.12        | 172.79               | 0.08               |
| 336    | 178.11        | 0.16        | 179.3                | 0.24               |

112  
 113  
 114  
 115  
 116  
 117  
 118  
 119  
 120

## 121 **Transparent Methods**

122 **Strains, media, antibiotics and growth conditions:** *E. coli* K12 MG1655 was used as the WT  
123 parent for evolution of 32xR (TMP-resistant) *E. coli*. Another K12 strain- *E. coli* BW25113 and  
124 BW25113: $\Delta$ *glyA* from the Keio collection, used for comparative evolution were purchased  
125 from the Coli Genetic Stock Centre, Yale University, New Haven, USA and revived using LB  
126 and LB-25  $\mu$ g/mL kanamycin respectively as per instructions (Baba et al., 2006). The MDR-  
127 clinical isolate of uropathogenic *E. coli* was obtained from Ramaiah Memorial Hospital,  
128 Bangalore, India. All strains were grown in M9 minimal medium supplemented with 0.4%  
129 glucose and 0.4% Bacto™ casamino acids, at 37°C and 180 rpm. The clinical isolate and 32xR  
130 *E. coli* were maintained in M9-16  $\mu$ g/mL TMP to prevent loss of resistance. TMP (2 mg/mL),  
131 kanamycin (50 mg/mL) and chloramphenicol (35 mg/mL) were prepared in DMSO, distilled  
132 water and methanol respectively, filter sterilized and stored at -20°C.

133 **Minimum inhibitory concentration (MIC) measurement:** Two-fold serial dilutions of TMP  
134 were prepared in a sterile 96- well plate in a final volume of 100  $\mu$ L per well and inoculated  
135 with an appropriately diluted overnight culture such that each well contained  $\sim 5 \times 10^5$  cells.  
136 Estimation of cell density was carried out using freshly prepared McFarland's turbidity  
137 standard no. 0.5 (0.05 mL 1% BaCl<sub>2</sub> and 9.95 mL 1% H<sub>2</sub>SO<sub>4</sub>). The lowest concentration that  
138 visibly inhibited growth ( $A_{600} < 0.2$ ) was noted as the MIC. Experiments were performed in  
139 triplicates.

140 **Evolution of TMP-resistant (32xR) *E. coli*:** Two well isolated colonies were selected and  
141 overnight cultures of the same were used to inoculate (1%) 20 mL M9 for WT controls and M9  
142 with a sub-inhibitory concentration of TMP (0.125  $\mu$ g/mL; 0.25 x MIC) for the evolution of  
143 resistant *E. coli*. Thus, a control and a resistant culture were derived from each colony. The  
144 TMP exposed cultures were allowed to attain an  $A_{600} \sim 0.6$ , following which they were used to  
145 inoculate the next batch of media containing a two-fold higher concentration of TMP, such that  
146 the initial  $A_{600}$  was at least 0.1. In all iterations thereafter, the TMP concentration was doubled  
147 until a concentration of 16  $\mu$ g/mL (32 x MIC) was achieved. Adaptation beyond this  
148 concentration was not continued since it is likely to be outside the physiologically encountered  
149 range, as TMP is toxic to the host at a concentration of 20  $\mu$ g/mL (Schulz and Schmoldt, 2003).

## 150 **Microarray and transcriptome analysis**

151 **Samples:** Cells were harvested from 40 mL exponential phase ( $A_{600} \sim 0.5$ ) cultures of WT1,  
152 WT2, 4xR1, 4xR2, 32xR1 and 32xR *E. coli* at 5000 rpm for 10 minutes, snap frozen and stored  
153 at -80°C. RNA was extracted using RNeasy Mini Kit (Qiagen). Quantification and estimation of  
154 purity with  $A_{260/280}$  was done using NanoDrop ND-1000 spectrophotometer (NanoDrop  
155 Technologies). Integrity of RNA was verified on Agilent 2100 Bioanalyzer using RNA 6000  
156 Nano LabChip (Agilent Technologies).

157 Labelling and hybridization: Labelling was performed using Quick-Amp Labelling Kit, One  
158 Colour Part Number 5190-0442 (Agilent Technologies), which employs T7 RNA polymerase  
159 which simultaneously amplifies target RNA and incorporates Cy3-labelled CTP. Hybridization  
160 of labelled RNA was done using Gene Expression Hybridization Kit (Agilent Technologies). A  
161 custom *E. coli* 8x15k array (AMADID: 019439) was used. RNA extraction, hybridization and  
162 data collection were done by Genotypic Technology Private Limited, Bangalore, India.

163 Transcriptome analysis: Raw data was processed using the limma package of R Bioconductor  
164 (Gentleman et al., 2004; Ritchie et al., 2015). Pre-processing included background correction,  
165 quantile normalization and filtering out of control and low expressing probes (R code in  
166 Supplementary Files). To filter out low expressing probes, 95<sup>th</sup> percentile of intensity values of  
167 all negative control probes on the array was calculated and probes expressing at least 15%  
168 brighter than this value were retained. Normalized signal intensity values for genes were  
169 obtained as corrected log<sub>2</sub> transformed, probe averaged values of their respective raw signal  
170 intensities. Data fitting was performed using the linear modelling function “lmFit” in the limma  
171 package and a pairwise comparison between gene expression profiles of the three conditions  
172 was carried out to identify differentially expressed genes (DEGs): genes with log<sub>2</sub>Fold Change  
173 (FC) ≥ 1 (FDR-adjusted p-value < 0.05) between the WT and 4xR or 32xR *E. coli* were  
174 considered as DEGs. Gene enrichment analysis for DEGs was carried out using PANTHERv13  
175 and the ClueGo v2.3 (Bindea et al., 2009; Mi et al., 2010).

176 ***E. coli* protein-protein interaction network (EcPPIN) and 32xNet construction:** Base  
177 network/EcPPIN: Interactions between proteins in *E. coli* MG1655 were downloaded from  
178 STRING database v10 (Szklarczyk et al., 2015). STRING is a collection of direct (physical) and  
179 indirect (functional/regulatory) interactions between proteins observed through experiments  
180 or predicted (inferred) from bioinformatics methods based on domain fusion, phylogeny, gene  
181 co-expression and gene neighbourhood considerations. Each interaction in the database is  
182 associated with a confidence score on a scale of 0 to 1000 and interactions with score ≥ 700  
183 are marked as “high-confidence”. Only 19750 high-confidence interactions with a combined  
184 score ≥ 850 or experimental score ≥ 700 were selected. Mapping of gene names to b numbers  
185 (STRING v10 uses b numbers) was done using EcoGene 3.0 database (Zhou and Rudd, 2013).  
186 Finally, 19022 interactions between 3435 proteins for which we had gene expression data  
187 were retained for further analysis.

188 Several biological interactions are unidirectional and therefore, adding directions to a protein  
189 interaction network makes it biologically meaningful. Directions for regulatory interactions (TF  
190 → gene) were obtained from STRING v10, RegulonDB v7, EcoCyc and a study on organization  
191 of gene regulation in *E. coli* (Gama-Castro et al., 2011; Keseler et al., 2011; Shen-Orr et al.,  
192 2002; Szklarczyk et al., 2015). Directions for metabolic interactions were obtained from the *E.*  
193 *coli* genome scale metabolic reconstruction model iJO1366 using code developed earlier for  
194 extracting directed interactions between enzymes from a mathematical model (Asgari et al.,  
195 2013; Orth et al., 2011). Directions for interactions between genes encoding two component

196 systems were obtained from the KEGG database (Kanehisa and Goto, 2000). After a final round  
197 of manual curation, a high-confidence genome scale network, EcPPIN, containing 3498 genes  
198 and 24542 interactions of which 13631 (55.5%) were directed, was obtained.

199 32xNet: For 32xNet construction, weights were added to the genes (nodes) in EcPPIN i.e. it  
200 was made condition-specific to reflect transcriptomic differences between WT and 32xR *E.*  
201 *coli*. The node weight (NW) for a gene *i* in EcPPIN was the absolute log<sub>2</sub>FC calculated as;

$$202 \quad \mathbf{NW}_i = |R_i - W_i|$$

203 where  $R_i$  and  $W_i$  are the fitted mean log<sub>2</sub> transformed signal intensities of gene *i* in 32xR (mean  
204 of 32xR1 and 32xR2) and WT (mean of WT1 and WT2) respectively.

205 Edge weight ( $EW_{ij}$ ) for an interaction between genes *i* and *j* was calculated as;

$$206 \quad \mathbf{EW}_{ij} = \mathbf{NW}_i \times \mathbf{NW}_j$$

207 Shortest paths estimation and analysis of 32xTopNet: Inversed edge weight(s) ( $EW'_{ij}$ ) for  
208 implementation of Dijkstra's algorithm were calculated as;

$$209 \quad \mathbf{EW}'_{ij} = (\mathbf{EW}_{\max} + \mathbf{EW}_{\min}) - \mathbf{EW}_{ij};$$

210 where  $EW_{\max}$  and  $EW_{\min}$  are the maximum and minimum edge weights in the network. Finally,  
211 normalized path cost was calculated as

$$212 \quad \mathbf{Path \ cost} = (\Sigma \mathbf{EW}'_{ij}) / n$$

213 where *n* is the number of edges in the path.

214 Shortest paths were sorted(ranked) according to path cost and subsets (0.05% to 0.5% paths  
215 at an interval of 0.05%) containing top-ranked shortest paths (top-paths) were evaluated for  
216 DEG enrichment with hypergeometric test using SuperExactTest considering a total (*n*) of  
217 3435 genes (Wang et al., 2015) (Table S3). Identification of clusters was done using  
218 ClusterONE in Cytoscape (Nepusz et al., 2012; Shannon et al., 2003).

### 219 **Biofilm quantification**

220 Crystal violet staining: WT was grown in 2 mL M9, M9-0.125 mg/L TMP and M9-0.25 mg/L  
221 TMP and 32xR strains were grown in 2 mL M9 and M9-16 mg/L TMP over a period of 5 days  
222 at room temperature without shaking in 24-well plates. Post incubation, the culture was  
223 decanted, the wells were gently washed with PBS and stained with 1% crystal violet for 15  
224 minutes. Excess unbound dye was rinsed away with three distilled water washes.  
225 Quantification of the biofilm on the sides and the bottom of each well was done by dissolving  
226 the crystal violet with 2 mL absolute ethanol and recording the absorbance  
227 spectrophotometrically at 590 nm.

228 Scanning electron microscopy: The experiment was set up as described for the crystal violet  
229 staining with the addition of a sterile coverslip at the bottom of each well. Post incubation, the

230 culture was decanted, and the coverslips were transferred to clean wells, fixed with 2.5%  
231 glutaraldehyde for 24 hours at 4 °C and washed with PBS post incubation. Serial dehydration  
232 was carried out using pre-chilled 30%, 50%, 70%, 80%, 90%, 95% and 100% ethanol. Vacuum  
233 desiccated coverslips were coated with gold for 38 seconds and images at 4000X, 8000X and  
234 12000X were recorded using Thermo Scientific™ Quanta™ ESEM™ microscope.

235 **Generation of *glyA* knockouts:** Gene knockout was performed according to the protocol  
236 described elsewhere (Datsenko and Wanner, 2000). Briefly, *E. coli* was transformed with a  
237 plasmid pKD46 which has the red recombinase enzyme under the control of PBAD promoter,  
238 inducible by arabinose. Transformants harbouring pKD46 were grown in 5 mL of M9  
239 containing ampicillin (50 µg/mL) and L-arabinose (20 mM) at 30°C. pKD3 was used for the  
240 amplification of the chloramphenicol resistance gene. Competent cells were transformed with  
241 the chloramphenicol resistance gene flanked by the homologous sequence of *glyA*.  
242 Transformants were selected on chloramphenicol (35 µg/mL) containing M9 plate. Putative  
243 knockout colonies were screened by a PCR based method with confirmatory primers and  
244 chloramphenicol resistance internal primers. The sequences of the primers used in this study  
245 are: 5'CTGTTATCGACAATGATTCCGGTTATACTGTTCCGCGTTGCATATGAATATCCTCCTTAG3'  
246 (Forward) and  
247 5'ACATTGACAGCAAATCACCGTTTCGCTTATGCGTAAACCGGTGTAGGCTGGAGCTGCTTC3'  
248 (Reverse).

249 **Comparative evolution:** In a 96 well plate, two-fold dilutions of TMP were prepared ranging  
250 from 16 µg/mL to 0.125 µg/mL in a final volume of 100 µL and inoculated with 1 µL log phase  
251 cultures of BW25113:Δ*glyA* and its wild-type parent *E. coli* BW25113 obtained from 6 well  
252 isolated colonies of each strain. The plate was incubated at 37 °C for 12 hours and 1 µL culture  
253 from the well with the highest TMP concentration showing an  $A_{600} \geq A_{600}$  of the corresponding  
254 well without TMP (un-inhibited growth), was used to inoculate the next plate. Successive  
255 inoculations were carried out every 12 hours for 14 days. The generations completed in 12  
256 hours for each replicate were calculated using a previously used formula (Zampieri et al.,  
257 2017):  $\log_2(A_{600}(\text{fin})/A_{600}(0)/100)$ ; where  $A_{600}(\text{fin})$  is the  $A_{600}$  obtained after 12 hours for a well  
258 X and  $A_{600}(0)$  is the  $A_{600}$  of the well from which 1 µL of the culture was taken for inoculation of  
259 well X.

## 260 Supplemental references

261 Asgari, Y., Salehzadeh-Yazdi, A., Schreiber, F., and Masoudi-Nejad, A. (2013). Controllability in cancer  
262 metabolic networks according to drug targets as driver nodes. PLoS ONE 8, e79397.

263 Baba, T., Ara, T., Hasegawa, M., Takai, Y., Okumura, Y., Baba, M., Datsenko, K.A., Tomita, M., Wanner,  
264 B.L., and Mori, H. (2006). Construction of Escherichia coli K-12 in-frame, single-gene knockout  
265 mutants: the Keio collection. Mol. Syst. Biol. 2, 2006.0008.

266 Bindea, G., Mlecnik, B., Hackl, H., Charoentong, P., Tosolini, M., Kirilovsky, A., Fridman, W.-H., Pagès,  
267 F., Trajanoski, Z., and Galon, J. (2009). ClueGO: a Cytoscape plug-in to decipher functionally grouped  
268 gene ontology and pathway annotation networks. Bioinformatics 25, 1091–1093.

269 Datsenko, K.A., and Wanner, B.L. (2000). One-step inactivation of chromosomal genes in *Escherichia*  
270 *coli* K-12 using PCR products. *Proc. Natl. Acad. Sci. U.S.A.* 97, 6640–6645.

271 Gama-Castro, S., Salgado, H., Peralta-Gil, M., Santos-Zavaleta, A., Muñiz-Rascado, L., Solano-Lira, H.,  
272 Jimenez-Jacinto, V., Weiss, V., Garcia-Sotelo, J.S., López-Fuentes, A., et al. (2011). RegulonDB  
273 version 7.0: transcriptional regulation of *Escherichia coli* K-12 integrated within genetic sensory  
274 response units (Gensor Units). *Nucleic Acids Res.* 39, D98-105.

275 Gentleman, R.C., Carey, V.J., Bates, D.M., Bolstad, B., Dettling, M., Dudoit, S., Ellis, B., Gautier, L., Ge,  
276 Y., Gentry, J., et al. (2004). Bioconductor: open software development for computational biology and  
277 bioinformatics. *Genome Biol.* 5, R80.

278 Kanehisa, M., and Goto, S. (2000). KEGG: kyoto encyclopedia of genes and genomes. *Nucleic Acids*  
279 *Res.* 28, 27–30.

280 Keseler, I.M., Collado-Vides, J., Santos-Zavaleta, A., Peralta-Gil, M., Gama-Castro, S., Muñiz-Rascado,  
281 L., Bonavides-Martinez, C., Paley, S., Krummenacker, M., Altman, T., et al. (2011). EcoCyc: a  
282 comprehensive database of *Escherichia coli* biology. *Nucleic Acids Res.* 39, D583-590.

283 Mi, H., Dong, Q., Muruganujan, A., Gaudet, P., Lewis, S., and Thomas, P.D. (2010). PANTHER version  
284 7: improved phylogenetic trees, orthologs and collaboration with the Gene Ontology Consortium.  
285 *Nucleic Acids Res.* 38, D204-210.

286 Nepusz, T., Yu, H., and Paccanaro, A. (2012). Detecting overlapping protein complexes in protein-  
287 protein interaction networks. *Nat. Methods* 9, 471–472.

288 Orth, J.D., Conrad, T.M., Na, J., Lerman, J.A., Nam, H., Feist, A.M., and Palsson, B.Ø. (2011). A  
289 comprehensive genome-scale reconstruction of *Escherichia coli* metabolism--2011. *Mol. Syst. Biol.* 7,  
290 535.

291 Ritchie, M.E., Phipson, B., Wu, D., Hu, Y., Law, C.W., Shi, W., and Smyth, G.K. (2015). limma powers  
292 differential expression analyses for RNA-sequencing and microarray studies. *Nucleic Acids Res.* 43,  
293 e47.

294 Schulz, M., and Schmoldt, A. (2003). Therapeutic and toxic blood concentrations of more than 800  
295 drugs and other xenobiotics. *Pharmazie* 58, 447–474.

296 Shannon, P., Markiel, A., Ozier, O., Baliga, N.S., Wang, J.T., Ramage, D., Amin, N., Schwikowski, B.,  
297 and Ideker, T. (2003). Cytoscape: a software environment for integrated models of biomolecular  
298 interaction networks. *Genome Res.* 13, 2498–2504.

299 Shen-Orr, S.S., Milo, R., Mangan, S., and Alon, U. (2002). Network motifs in the transcriptional  
300 regulation network of *Escherichia coli*. *Nat. Genet.* 31, 64–68.

301 Szklarczyk, D., Franceschini, A., Wyder, S., Forslund, K., Heller, D., Huerta-Cepas, J., Simonovic, M.,  
302 Roth, A., Santos, A., Tsafou, K.P., et al. (2015). STRING v10: protein-protein interaction networks,  
303 integrated over the tree of life. *Nucleic Acids Res.* 43, D447-452.

304 Wang, M., Zhao, Y., and Zhang, B. (2015). Efficient Test and Visualization of Multi-Set Intersections.  
305 *Sci Rep* 5, 16923.

306 Zampieri, M., Enke, T., Chubukov, V., Ricci, V., Piddock, L., and Sauer, U. (2017). Metabolic  
307 constraints on the evolution of antibiotic resistance. *Mol. Syst. Biol.* 13, 917.

308 Zhou, J., and Rudd, K.E. (2013). EcoGene 3.0. *Nucleic Acids Res.* 41, D613-624.

309
